# Supplementary material
Source: publisher figshare collection journal article supplement (https://asha.figshare.com/articles/dataset/_/19233237)
Supplement: Supplementary file 1 [file 1]

# ■ Protocol for the Analysis of Aided Language Samples in Spanish (PAALSS)

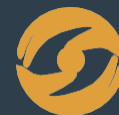

Aided Language  
Sampling Analysis in  
Spanish

Today's date (mm/dd/yy): \_\_\_\_\_

## CLIENT BACKGROUND INFORMATION

Name of client (First/Last):

Birth date of client (mm/dd/yy): \_\_\_\_\_

Age of client:

Year(s)

Month(s)

Etiology: \_\_\_\_\_

Receptive language: \_\_\_\_\_

■ Measured by: \_\_\_\_\_

Expressive language: \_\_\_\_\_

■ Measured by: \_\_\_\_\_

Literacy level: \_\_\_\_\_

■ Measured by: \_\_\_\_\_

Adaptive behavior: \_\_\_\_\_

■ Measured by: \_\_\_\_\_

Vision: \_\_\_\_\_

Hearing: \_\_\_\_\_

## CLIENT AIDS AND DEVICES

High-tech AAC aids: \_\_\_\_\_

No tech or low-tech aids: \_\_\_\_\_

Wheelchair; manual or powered: \_\_\_\_\_

Walker: \_\_\_\_\_

Pointer (e.g., head, hand, etc.): \_\_\_\_\_

Switches: \_\_\_\_\_

Other AT Aids: \_\_\_\_\_

## COMMUNICATION PARTNER INFORMATION

Communication Partner/s (e.g., parents, teachers, etc.) and date: \_\_\_\_\_

\_\_\_\_\_

Communication partner usage of communication behaviors per sample:

Open ended questions: \_\_\_\_\_ Yes/No questions: \_\_\_\_\_

Aided models: \_\_\_\_\_ Gestural prompts: \_\_\_\_\_

Verbal prompts: \_\_\_\_\_ Recasts and expansions: \_\_\_\_\_

Other: \_\_\_\_\_

# Language Sample

Name of client (First/Last): \_\_\_\_\_

Elicitation activities: \_\_\_\_\_

Date (mm/dd/yy): \_\_\_\_\_

Name of communication partner (First/Last): \_\_\_\_\_

Length of recording: \_\_\_\_\_

| # | Utterance | Modality<br>(e.g., SGD, vocalization) | Notes |
|---|-----------|---------------------------------------|-------|
|   |           |                                       |       |
|   |           |                                       |       |
|   |           |                                       |       |
|   |           |                                       |       |
|   |           |                                       |       |
|   |           |                                       |       |
|   |           |                                       |       |
|   |           |                                       |       |
|   |           |                                       |       |
|   |           |                                       |       |
|   |           |                                       |       |

★ Add as many rows as necessary



# I. Vocabulary

Mark all the words that appear in your sample. Use the 'other' space to add those words used in the sample but not available in the vocabulary list. For verbs used in the sample, check their infinitive form and use the Morphology section to indicate their person and tense. You can also use the vocabulary list below to check if the words in the Protocol are not available in the client's AAC system or have not been targeted in intervention.

## NOUNS

### Animals

|                                   |                                                      |                                                     |
|-----------------------------------|------------------------------------------------------|-----------------------------------------------------|
| <input type="checkbox"/> ardilla  | <input type="checkbox"/> not available in the system | <input type="checkbox"/> available but not targeted |
| <input type="checkbox"/> bicho    | <input type="checkbox"/> not available in the system | <input type="checkbox"/> available but not targeted |
| <input type="checkbox"/> caballo  | <input type="checkbox"/> not available in the system | <input type="checkbox"/> available but not targeted |
| <input type="checkbox"/> conejo   | <input type="checkbox"/> not available in the system | <input type="checkbox"/> available but not targeted |
| <input type="checkbox"/> gallina  | <input type="checkbox"/> not available in the system | <input type="checkbox"/> available but not targeted |
| <input type="checkbox"/> gato     | <input type="checkbox"/> not available in the system | <input type="checkbox"/> available but not targeted |
| <input type="checkbox"/> jirafa   | <input type="checkbox"/> not available in the system | <input type="checkbox"/> available but not targeted |
| <input type="checkbox"/> león     | <input type="checkbox"/> not available in the system | <input type="checkbox"/> available but not targeted |
| <input type="checkbox"/> mariposa | <input type="checkbox"/> not available in the system | <input type="checkbox"/> available but not targeted |
| <input type="checkbox"/> mono     | <input type="checkbox"/> not available in the system | <input type="checkbox"/> available but not targeted |
| <input type="checkbox"/> osito    | <input type="checkbox"/> not available in the system | <input type="checkbox"/> available but not targeted |
| <input type="checkbox"/> oso      | <input type="checkbox"/> not available in the system | <input type="checkbox"/> available but not targeted |
| <input type="checkbox"/> pájaro   | <input type="checkbox"/> not available in the system | <input type="checkbox"/> available but not targeted |
| <input type="checkbox"/> pato     | <input type="checkbox"/> not available in the system | <input type="checkbox"/> available but not targeted |
| <input type="checkbox"/> perro    | <input type="checkbox"/> not available in the system | <input type="checkbox"/> available but not targeted |
| <input type="checkbox"/> pescado  | <input type="checkbox"/> not available in the system | <input type="checkbox"/> available but not targeted |
| <input type="checkbox"/> pingüino | <input type="checkbox"/> not available in the system | <input type="checkbox"/> available but not targeted |
| <input type="checkbox"/> pollito  | <input type="checkbox"/> not available in the system | <input type="checkbox"/> available but not targeted |
| <input type="checkbox"/> pollo    | <input type="checkbox"/> not available in the system | <input type="checkbox"/> available but not targeted |
| <input type="checkbox"/> rana     | <input type="checkbox"/> not available in the system | <input type="checkbox"/> available but not targeted |
| <input type="checkbox"/> ratón    | <input type="checkbox"/> not available in the system | <input type="checkbox"/> available but not targeted |
| <input type="checkbox"/> vaca     | <input type="checkbox"/> not available in the system | <input type="checkbox"/> available but not targeted |

Other: \_\_\_\_\_

### People

|                                  |                                                      |                                                     |
|----------------------------------|------------------------------------------------------|-----------------------------------------------------|
| <input type="checkbox"/> abuela  | <input type="checkbox"/> not available in the system | <input type="checkbox"/> available but not targeted |
| <input type="checkbox"/> abuelo  | <input type="checkbox"/> not available in the system | <input type="checkbox"/> available but not targeted |
| <input type="checkbox"/> amigo   | <input type="checkbox"/> not available in the system | <input type="checkbox"/> available but not targeted |
| <input type="checkbox"/> hermana | <input type="checkbox"/> not available in the system | <input type="checkbox"/> available but not targeted |
| <input type="checkbox"/> hermano | <input type="checkbox"/> not available in the system | <input type="checkbox"/> available but not targeted |
| <input type="checkbox"/> maestra | <input type="checkbox"/> not available in the system | <input type="checkbox"/> available but not targeted |
| <input type="checkbox"/> mamá*   | <input type="checkbox"/> not available in the system | <input type="checkbox"/> available but not targeted |
| <input type="checkbox"/> niña    | <input type="checkbox"/> not available in the system | <input type="checkbox"/> available but not targeted |
| <input type="checkbox"/> niño    | <input type="checkbox"/> not available in the system | <input type="checkbox"/> available but not targeted |
| <input type="checkbox"/> papá*   | <input type="checkbox"/> not available in the system | <input type="checkbox"/> available but not targeted |
| <input type="checkbox"/> payaso  | <input type="checkbox"/> not available in the system | <input type="checkbox"/> available but not targeted |
| <input type="checkbox"/> policía | <input type="checkbox"/> not available in the system | <input type="checkbox"/> available but not targeted |
| <input type="checkbox"/> prima   | <input type="checkbox"/> not available in the system | <input type="checkbox"/> available but not targeted |
| <input type="checkbox"/> primo   | <input type="checkbox"/> not available in the system | <input type="checkbox"/> available but not targeted |
| <input type="checkbox"/> tía     | <input type="checkbox"/> not available in the system | <input type="checkbox"/> available but not targeted |

Other: \_\_\_\_\_

### Food and Drinks

|                                    |                                                      |                                                     |
|------------------------------------|------------------------------------------------------|-----------------------------------------------------|
| <input type="checkbox"/> agua*     | <input type="checkbox"/> not available in the system | <input type="checkbox"/> available but not targeted |
| <input type="checkbox"/> azúcar    | <input type="checkbox"/> not available in the system | <input type="checkbox"/> available but not targeted |
| <input type="checkbox"/> calabaza  | <input type="checkbox"/> not available in the system | <input type="checkbox"/> available but not targeted |
| <input type="checkbox"/> chocolate | <input type="checkbox"/> not available in the system | <input type="checkbox"/> available but not targeted |
| <input type="checkbox"/> comida    | <input type="checkbox"/> not available in the system | <input type="checkbox"/> available but not targeted |
| <input type="checkbox"/> dulce     | <input type="checkbox"/> not available in the system | <input type="checkbox"/> available but not targeted |
| <input type="checkbox"/> galleta   | <input type="checkbox"/> not available in the system | <input type="checkbox"/> available but not targeted |
| <input type="checkbox"/> helado    | <input type="checkbox"/> not available in the system | <input type="checkbox"/> available but not targeted |
| <input type="checkbox"/> hielo     | <input type="checkbox"/> not available in the system | <input type="checkbox"/> available but not targeted |
| <input type="checkbox"/> jugo/zumo | <input type="checkbox"/> not available in the system | <input type="checkbox"/> available but not targeted |

## NOUNS (continued)

### Food and Drinks (continued)

- |                                      |                                                      |                                                     |
|--------------------------------------|------------------------------------------------------|-----------------------------------------------------|
| <input type="checkbox"/> leche       | <input type="checkbox"/> not available in the system | <input type="checkbox"/> available but not targeted |
| <input type="checkbox"/> naranja     | <input type="checkbox"/> not available in the system | <input type="checkbox"/> available but not targeted |
| <input type="checkbox"/> papa/patata | <input type="checkbox"/> not available in the system | <input type="checkbox"/> available but not targeted |

Other: \_\_\_\_\_

### Home Objects

- |                                   |                                                      |                                                     |
|-----------------------------------|------------------------------------------------------|-----------------------------------------------------|
| <input type="checkbox"/> cuchara  | <input type="checkbox"/> not available in the system | <input type="checkbox"/> available but not targeted |
| <input type="checkbox"/> cuna     | <input type="checkbox"/> not available in the system | <input type="checkbox"/> available but not targeted |
| <input type="checkbox"/> escalera | <input type="checkbox"/> not available in the system | <input type="checkbox"/> available but not targeted |
| <input type="checkbox"/> escoba   | <input type="checkbox"/> not available in the system | <input type="checkbox"/> available but not targeted |
| <input type="checkbox"/> espejo   | <input type="checkbox"/> not available in the system | <input type="checkbox"/> available but not targeted |
| <input type="checkbox"/> luz      | <input type="checkbox"/> not available in the system | <input type="checkbox"/> available but not targeted |
| <input type="checkbox"/> mesa     | <input type="checkbox"/> not available in the system | <input type="checkbox"/> available but not targeted |
| <input type="checkbox"/> peine    | <input type="checkbox"/> not available in the system | <input type="checkbox"/> available but not targeted |
| <input type="checkbox"/> plato    | <input type="checkbox"/> not available in the system | <input type="checkbox"/> available but not targeted |
| <input type="checkbox"/> puerta   | <input type="checkbox"/> not available in the system | <input type="checkbox"/> available but not targeted |
| <input type="checkbox"/> silla    | <input type="checkbox"/> not available in the system | <input type="checkbox"/> available but not targeted |
| <input type="checkbox"/> teléfono | <input type="checkbox"/> not available in the system | <input type="checkbox"/> available but not targeted |
| <input type="checkbox"/> vaso     | <input type="checkbox"/> not available in the system | <input type="checkbox"/> available but not targeted |

Other: \_\_\_\_\_

### Body Parts

- |                                |                                                      |                                                     |
|--------------------------------|------------------------------------------------------|-----------------------------------------------------|
| <input type="checkbox"/> boca  | <input type="checkbox"/> not available in the system | <input type="checkbox"/> available but not targeted |
| <input type="checkbox"/> cara  | <input type="checkbox"/> not available in the system | <input type="checkbox"/> available but not targeted |
| <input type="checkbox"/> mano  | <input type="checkbox"/> not available in the system | <input type="checkbox"/> available but not targeted |
| <input type="checkbox"/> nariz | <input type="checkbox"/> not available in the system | <input type="checkbox"/> available but not targeted |
| <input type="checkbox"/> ojo   | <input type="checkbox"/> not available in the system | <input type="checkbox"/> available but not targeted |
| <input type="checkbox"/> oreja | <input type="checkbox"/> not available in the system | <input type="checkbox"/> available but not targeted |

## NOUNS (continued)

### Body Parts (continued)

- |                               |                                                      |                                                     |
|-------------------------------|------------------------------------------------------|-----------------------------------------------------|
| <input type="checkbox"/> pelo | <input type="checkbox"/> not available in the system | <input type="checkbox"/> available but not targeted |
| <input type="checkbox"/> pie  | <input type="checkbox"/> not available in the system | <input type="checkbox"/> available but not targeted |
| <input type="checkbox"/> teta | <input type="checkbox"/> not available in the system | <input type="checkbox"/> available but not targeted |

Other: \_\_\_\_\_

### Toys

- |                                   |                                                      |                                                     |
|-----------------------------------|------------------------------------------------------|-----------------------------------------------------|
| <input type="checkbox"/> carriola | <input type="checkbox"/> not available in the system | <input type="checkbox"/> available but not targeted |
| <input type="checkbox"/> colores  | <input type="checkbox"/> not available in the system | <input type="checkbox"/> available but not targeted |
| <input type="checkbox"/> globo    | <input type="checkbox"/> not available in the system | <input type="checkbox"/> available but not targeted |
| <input type="checkbox"/> juguete  | <input type="checkbox"/> not available in the system | <input type="checkbox"/> available but not targeted |
| <input type="checkbox"/> lápiz    | <input type="checkbox"/> not available in the system | <input type="checkbox"/> available but not targeted |
| <input type="checkbox"/> muñeca   | <input type="checkbox"/> not available in the system | <input type="checkbox"/> available but not targeted |
| <input type="checkbox"/> pala     | <input type="checkbox"/> not available in the system | <input type="checkbox"/> available but not targeted |
| <input type="checkbox"/> papel    | <input type="checkbox"/> not available in the system | <input type="checkbox"/> available but not targeted |
| <input type="checkbox"/> pelota*  | <input type="checkbox"/> not available in the system | <input type="checkbox"/> available but not targeted |

Other: \_\_\_\_\_

### Vehicles

- |                                  |                                                      |                                                     |
|----------------------------------|------------------------------------------------------|-----------------------------------------------------|
| <input type="checkbox"/> avión   | <input type="checkbox"/> not available in the system | <input type="checkbox"/> available but not targeted |
| <input type="checkbox"/> barco   | <input type="checkbox"/> not available in the system | <input type="checkbox"/> available but not targeted |
| <input type="checkbox"/> camion* | <input type="checkbox"/> not available in the system | <input type="checkbox"/> available but not targeted |
| <input type="checkbox"/> carro   | <input type="checkbox"/> not available in the system | <input type="checkbox"/> available but not targeted |
| <input type="checkbox"/> coche   | <input type="checkbox"/> not available in the system | <input type="checkbox"/> available but not targeted |
| <input type="checkbox"/> moto    | <input type="checkbox"/> not available in the system | <input type="checkbox"/> available but not targeted |
| <input type="checkbox"/> tractor | <input type="checkbox"/> not available in the system | <input type="checkbox"/> available but not targeted |
| <input type="checkbox"/> tren    | <input type="checkbox"/> not available in the system | <input type="checkbox"/> available but not targeted |

Other: \_\_\_\_\_



## NOUNS (continued)

### Places

- |                                 |                                                      |                                                     |
|---------------------------------|------------------------------------------------------|-----------------------------------------------------|
| <input type="checkbox"/> calle  | <input type="checkbox"/> not available in the system | <input type="checkbox"/> available but not targeted |
| <input type="checkbox"/> casa   | <input type="checkbox"/> not available in the system | <input type="checkbox"/> available but not targeted |
| <input type="checkbox"/> cocina | <input type="checkbox"/> not available in the system | <input type="checkbox"/> available but not targeted |
| <input type="checkbox"/> parque | <input type="checkbox"/> not available in the system | <input type="checkbox"/> available but not targeted |
| <input type="checkbox"/> playa  | <input type="checkbox"/> not available in the system | <input type="checkbox"/> available but not targeted |

Other: \_\_\_\_\_

### Clothing

- |                                         |                                                      |                                                     |
|-----------------------------------------|------------------------------------------------------|-----------------------------------------------------|
| <input type="checkbox"/> reloj          | <input type="checkbox"/> not available in the system | <input type="checkbox"/> available but not targeted |
| <input type="checkbox"/> sombrero/gorro | <input type="checkbox"/> not available in the system | <input type="checkbox"/> available but not targeted |
| <input type="checkbox"/> zapato         | <input type="checkbox"/> not available in the system | <input type="checkbox"/> available but not targeted |

Other: \_\_\_\_\_

### Outside Objects

- |                                   |                                                      |                                                     |
|-----------------------------------|------------------------------------------------------|-----------------------------------------------------|
| <input type="checkbox"/> estrella | <input type="checkbox"/> not available in the system | <input type="checkbox"/> available but not targeted |
| <input type="checkbox"/> flor     | <input type="checkbox"/> not available in the system | <input type="checkbox"/> available but not targeted |
| <input type="checkbox"/> sol      | <input type="checkbox"/> not available in the system | <input type="checkbox"/> available but not targeted |

Other: \_\_\_\_\_

### Activities

- |                                 |                                                      |                                                     |
|---------------------------------|------------------------------------------------------|-----------------------------------------------------|
| <input type="checkbox"/> besito | <input type="checkbox"/> not available in the system | <input type="checkbox"/> available but not targeted |
| <input type="checkbox"/> fiesta | <input type="checkbox"/> not available in the system | <input type="checkbox"/> available but not targeted |

Other: \_\_\_\_\_

### Time

- |                                |                                                      |                                                     |
|--------------------------------|------------------------------------------------------|-----------------------------------------------------|
| <input type="checkbox"/> tarde | <input type="checkbox"/> not available in the system | <input type="checkbox"/> available but not targeted |
|--------------------------------|------------------------------------------------------|-----------------------------------------------------|

## NOUNS (continued)

Time (continued)

Other: \_\_\_\_\_

Total # of Nouns:

## VERBS

|                                      |                                                      |                                                     |
|--------------------------------------|------------------------------------------------------|-----------------------------------------------------|
| <input type="checkbox"/> abrir       | <input type="checkbox"/> not available in the system | <input type="checkbox"/> available but not targeted |
| <input type="checkbox"/> acabar      | <input type="checkbox"/> not available in the system | <input type="checkbox"/> available but not targeted |
| <input type="checkbox"/> bailar      | <input type="checkbox"/> not available in the system | <input type="checkbox"/> available but not targeted |
| <input type="checkbox"/> buscar      | <input type="checkbox"/> not available in the system | <input type="checkbox"/> available but not targeted |
| <input type="checkbox"/> caer(se)    | <input type="checkbox"/> not available in the system | <input type="checkbox"/> available but not targeted |
| <input type="checkbox"/> caminar     | <input type="checkbox"/> not available in the system | <input type="checkbox"/> available but not targeted |
| <input type="checkbox"/> cantar      | <input type="checkbox"/> not available in the system | <input type="checkbox"/> available but not targeted |
| <input type="checkbox"/> cerrar      | <input type="checkbox"/> not available in the system | <input type="checkbox"/> available but not targeted |
| <input type="checkbox"/> cocinar     | <input type="checkbox"/> not available in the system | <input type="checkbox"/> available but not targeted |
| <input type="checkbox"/> comer(se)   | <input type="checkbox"/> not available in the system | <input type="checkbox"/> available but not targeted |
| <input type="checkbox"/> comprar     | <input type="checkbox"/> not available in the system | <input type="checkbox"/> available but not targeted |
| <input type="checkbox"/> correr      | <input type="checkbox"/> not available in the system | <input type="checkbox"/> available but not targeted |
| <input type="checkbox"/> dar*        | <input type="checkbox"/> not available in the system | <input type="checkbox"/> available but not targeted |
| <input type="checkbox"/> dormir(se)  | <input type="checkbox"/> not available in the system | <input type="checkbox"/> available but not targeted |
| <input type="checkbox"/> enseñar     | <input type="checkbox"/> not available in the system | <input type="checkbox"/> available but not targeted |
| <input type="checkbox"/> escuchar    | <input type="checkbox"/> not available in the system | <input type="checkbox"/> available but not targeted |
| <input type="checkbox"/> esperar(se) | <input type="checkbox"/> not available in the system | <input type="checkbox"/> available but not targeted |
| <input type="checkbox"/> estar       | <input type="checkbox"/> not available in the system | <input type="checkbox"/> available but not targeted |
| <input type="checkbox"/> gustar      | <input type="checkbox"/> not available in the system | <input type="checkbox"/> available but not targeted |
| <input type="checkbox"/> haber       | <input type="checkbox"/> not available in the system | <input type="checkbox"/> available but not targeted |
| <input type="checkbox"/> hablar      | <input type="checkbox"/> not available in the system | <input type="checkbox"/> available but not targeted |
| <input type="checkbox"/> hacer       | <input type="checkbox"/> not available in the system | <input type="checkbox"/> available but not targeted |

## VERBS (continued)

|                                     |                                                      |                                                     |
|-------------------------------------|------------------------------------------------------|-----------------------------------------------------|
| <input type="checkbox"/> ir(se)     | <input type="checkbox"/> not available in the system | <input type="checkbox"/> available but not targeted |
| <input type="checkbox"/> jugar      | <input type="checkbox"/> not available in the system | <input type="checkbox"/> available but not targeted |
| <input type="checkbox"/> llevar(se) | <input type="checkbox"/> not available in the system | <input type="checkbox"/> available but not targeted |
| <input type="checkbox"/> llorar     | <input type="checkbox"/> not available in the system | <input type="checkbox"/> available but not targeted |
| <input type="checkbox"/> mirar*     | <input type="checkbox"/> not available in the system | <input type="checkbox"/> available but not targeted |
| <input type="checkbox"/> morder     | <input type="checkbox"/> not available in the system | <input type="checkbox"/> available but not targeted |
| <input type="checkbox"/> oír        | <input type="checkbox"/> not available in the system | <input type="checkbox"/> available but not targeted |
| <input type="checkbox"/> parar(se)  | <input type="checkbox"/> not available in the system | <input type="checkbox"/> available but not targeted |
| <input type="checkbox"/> peinar(se) | <input type="checkbox"/> not available in the system | <input type="checkbox"/> available but not targeted |
| <input type="checkbox"/> perder(se) | <input type="checkbox"/> not available in the system | <input type="checkbox"/> available but not targeted |
| <input type="checkbox"/> poner(se)  | <input type="checkbox"/> not available in the system | <input type="checkbox"/> available but not targeted |
| <input type="checkbox"/> querer     | <input type="checkbox"/> not available in the system | <input type="checkbox"/> available but not targeted |
| <input type="checkbox"/> quitar     | <input type="checkbox"/> not available in the system | <input type="checkbox"/> available but not targeted |
| <input type="checkbox"/> romper     | <input type="checkbox"/> not available in the system | <input type="checkbox"/> available but not targeted |
| <input type="checkbox"/> saber      | <input type="checkbox"/> not available in the system | <input type="checkbox"/> available but not targeted |
| <input type="checkbox"/> salir(se)  | <input type="checkbox"/> not available in the system | <input type="checkbox"/> available but not targeted |
| <input type="checkbox"/> saltar     | <input type="checkbox"/> not available in the system | <input type="checkbox"/> available but not targeted |
| <input type="checkbox"/> sentar(se) | <input type="checkbox"/> not available in the system | <input type="checkbox"/> available but not targeted |
| <input type="checkbox"/> ser        | <input type="checkbox"/> not available in the system | <input type="checkbox"/> available but not targeted |
| <input type="checkbox"/> tener      | <input type="checkbox"/> not available in the system | <input type="checkbox"/> available but not targeted |
| <input type="checkbox"/> tirar      | <input type="checkbox"/> not available in the system | <input type="checkbox"/> available but not targeted |
| <input type="checkbox"/> tocar      | <input type="checkbox"/> not available in the system | <input type="checkbox"/> available but not targeted |
| <input type="checkbox"/> tomar(se)* | <input type="checkbox"/> not available in the system | <input type="checkbox"/> available but not targeted |
| <input type="checkbox"/> venir(se)  | <input type="checkbox"/> not available in the system | <input type="checkbox"/> available but not targeted |
| <input type="checkbox"/> ver(se)    | <input type="checkbox"/> not available in the system | <input type="checkbox"/> available but not targeted |

Other: \_\_\_\_\_

Total # of Verbs:

## PRONOUNS AND DETERMINANTS

|                                  |                                                      |                                                     |
|----------------------------------|------------------------------------------------------|-----------------------------------------------------|
| <input type="checkbox"/> aquella | <input type="checkbox"/> not available in the system | <input type="checkbox"/> available but not targeted |
| <input type="checkbox"/> dónde   | <input type="checkbox"/> not available in the system | <input type="checkbox"/> available but not targeted |
| <input type="checkbox"/> esa     | <input type="checkbox"/> not available in the system | <input type="checkbox"/> available but not targeted |
| <input type="checkbox"/> ese     | <input type="checkbox"/> not available in the system | <input type="checkbox"/> available but not targeted |
| <input type="checkbox"/> eso     | <input type="checkbox"/> not available in the system | <input type="checkbox"/> available but not targeted |
| <input type="checkbox"/> esta    | <input type="checkbox"/> not available in the system | <input type="checkbox"/> available but not targeted |
| <input type="checkbox"/> este    | <input type="checkbox"/> not available in the system | <input type="checkbox"/> available but not targeted |
| <input type="checkbox"/> esto*   | <input type="checkbox"/> not available in the system | <input type="checkbox"/> available but not targeted |
| <input type="checkbox"/> le      | <input type="checkbox"/> not available in the system | <input type="checkbox"/> available but not targeted |
| <input type="checkbox"/> me      | <input type="checkbox"/> not available in the system | <input type="checkbox"/> available but not targeted |
| <input type="checkbox"/> mi*     | <input type="checkbox"/> not available in the system | <input type="checkbox"/> available but not targeted |
| <input type="checkbox"/> mía*    | <input type="checkbox"/> not available in the system | <input type="checkbox"/> available but not targeted |
| <input type="checkbox"/> mío*    | <input type="checkbox"/> not available in the system | <input type="checkbox"/> available but not targeted |
| <input type="checkbox"/> por qué | <input type="checkbox"/> not available in the system | <input type="checkbox"/> available but not targeted |
| <input type="checkbox"/> que     | <input type="checkbox"/> not available in the system | <input type="checkbox"/> available but not targeted |
| <input type="checkbox"/> qué     | <input type="checkbox"/> not available in the system | <input type="checkbox"/> available but not targeted |
| <input type="checkbox"/> quién   | <input type="checkbox"/> not available in the system | <input type="checkbox"/> available but not targeted |
| <input type="checkbox"/> se*     | <input type="checkbox"/> not available in the system | <input type="checkbox"/> available but not targeted |
| <input type="checkbox"/> tuyo    | <input type="checkbox"/> not available in the system | <input type="checkbox"/> available but not targeted |
| <input type="checkbox"/> yo*     | <input type="checkbox"/> not available in the system | <input type="checkbox"/> available but not targeted |

Other: \_\_\_\_\_

Total # of Pronouns and Determinants:

## ADVERBS

|                                 |                                                      |                                                     |
|---------------------------------|------------------------------------------------------|-----------------------------------------------------|
| <input type="checkbox"/> abajo  | <input type="checkbox"/> not available in the system | <input type="checkbox"/> available but not targeted |
| <input type="checkbox"/> ahí*   | <input type="checkbox"/> not available in the system | <input type="checkbox"/> available but not targeted |
| <input type="checkbox"/> allá*  | <input type="checkbox"/> not available in the system | <input type="checkbox"/> available but not targeted |
| <input type="checkbox"/> allí   | <input type="checkbox"/> not available in the system | <input type="checkbox"/> available but not targeted |
| <input type="checkbox"/> aquí*  | <input type="checkbox"/> not available in the system | <input type="checkbox"/> available but not targeted |
| <input type="checkbox"/> arriba | <input type="checkbox"/> not available in the system | <input type="checkbox"/> available but not targeted |
| <input type="checkbox"/> más    | <input type="checkbox"/> not available in the system | <input type="checkbox"/> available but not targeted |
| <input type="checkbox"/> mucho  | <input type="checkbox"/> not available in the system | <input type="checkbox"/> available but not targeted |
| <input type="checkbox"/> no*    | <input type="checkbox"/> not available in the system | <input type="checkbox"/> available but not targeted |
| <input type="checkbox"/> otra   | <input type="checkbox"/> not available in the system | <input type="checkbox"/> available but not targeted |
| <input type="checkbox"/> otro   | <input type="checkbox"/> not available in the system | <input type="checkbox"/> available but not targeted |
| <input type="checkbox"/> sí     | <input type="checkbox"/> not available in the system | <input type="checkbox"/> available but not targeted |
| <input type="checkbox"/> ya     | <input type="checkbox"/> not available in the system | <input type="checkbox"/> available but not targeted |

Other: \_\_\_\_\_

Total # of Adverbs:

## ADJECTIVES

|                                        |                                                      |                                                     |
|----------------------------------------|------------------------------------------------------|-----------------------------------------------------|
| <input type="checkbox"/> amarillo      | <input type="checkbox"/> not available in the system | <input type="checkbox"/> available but not targeted |
| <input type="checkbox"/> azul          | <input type="checkbox"/> not available in the system | <input type="checkbox"/> available but not targeted |
| <input type="checkbox"/> blanco        | <input type="checkbox"/> not available in the system | <input type="checkbox"/> available but not targeted |
| <input type="checkbox"/> chico/pequeño | <input type="checkbox"/> not available in the system | <input type="checkbox"/> available but not targeted |
| <input type="checkbox"/> feo           | <input type="checkbox"/> not available in the system | <input type="checkbox"/> available but not targeted |
| <input type="checkbox"/> fría          | <input type="checkbox"/> not available in the system | <input type="checkbox"/> available but not targeted |
| <input type="checkbox"/> grande*       | <input type="checkbox"/> not available in the system | <input type="checkbox"/> available but not targeted |

## ADJECTIVES (continued)

- |                                       |                                                      |                                                     |
|---------------------------------------|------------------------------------------------------|-----------------------------------------------------|
| <input type="checkbox"/> limpio       | <input type="checkbox"/> not available in the system | <input type="checkbox"/> available but not targeted |
| <input type="checkbox"/> lindo/bonito | <input type="checkbox"/> not available in the system | <input type="checkbox"/> available but not targeted |
| <input type="checkbox"/> rojo         | <input type="checkbox"/> not available in the system | <input type="checkbox"/> available but not targeted |
| <input type="checkbox"/> verde        | <input type="checkbox"/> not available in the system | <input type="checkbox"/> available but not targeted |

Other: \_\_\_\_\_

Total # of Adjectives:

## SUBSTITUTES

- |                                           |                                                      |                                                     |
|-------------------------------------------|------------------------------------------------------|-----------------------------------------------------|
| <input type="checkbox"/> cua cua (pato)   | <input type="checkbox"/> not available in the system | <input type="checkbox"/> available but not targeted |
| <input type="checkbox"/> gua gua (perro)  | <input type="checkbox"/> not available in the system | <input type="checkbox"/> available but not targeted |
| <input type="checkbox"/> kikiriki (gallo) | <input type="checkbox"/> not available in the system | <input type="checkbox"/> available but not targeted |
| <input type="checkbox"/> miao (gato)      | <input type="checkbox"/> not available in the system | <input type="checkbox"/> available but not targeted |
| <input type="checkbox"/> mu (vaca)        | <input type="checkbox"/> not available in the system | <input type="checkbox"/> available but not targeted |
| <input type="checkbox"/> pío pío (pollo)  | <input type="checkbox"/> not available in the system | <input type="checkbox"/> available but not targeted |
| <input type="checkbox"/> pipi (carro)     | <input type="checkbox"/> not available in the system | <input type="checkbox"/> available but not targeted |

Other: \_\_\_\_\_

Total # of Substitutes:

## ARTICLES

- |                              |                                                      |                                                     |
|------------------------------|------------------------------------------------------|-----------------------------------------------------|
| <input type="checkbox"/> el* | <input type="checkbox"/> not available in the system | <input type="checkbox"/> available but not targeted |
| <input type="checkbox"/> la* | <input type="checkbox"/> not available in the system | <input type="checkbox"/> available but not targeted |
| <input type="checkbox"/> lo  | <input type="checkbox"/> not available in the system | <input type="checkbox"/> available but not targeted |
| <input type="checkbox"/> un* | <input type="checkbox"/> not available in the system | <input type="checkbox"/> available but not targeted |
| <input type="checkbox"/> una | <input type="checkbox"/> not available in the system | <input type="checkbox"/> available but not targeted |

Other: \_\_\_\_\_

Total # of Articles:

## NUMERALS

- |                                 |                                                      |                                                     |
|---------------------------------|------------------------------------------------------|-----------------------------------------------------|
| <input type="checkbox"/> cinco  | <input type="checkbox"/> not available in the system | <input type="checkbox"/> available but not targeted |
| <input type="checkbox"/> cuatro | <input type="checkbox"/> not available in the system | <input type="checkbox"/> available but not targeted |
| <input type="checkbox"/> dos    | <input type="checkbox"/> not available in the system | <input type="checkbox"/> available but not targeted |
| <input type="checkbox"/> tres   | <input type="checkbox"/> not available in the system | <input type="checkbox"/> available but not targeted |
| <input type="checkbox"/> uno    | <input type="checkbox"/> not available in the system | <input type="checkbox"/> available but not targeted |

Other: \_\_\_\_\_

Total # of Numerals:

## PREPOSITIONS

- |                                |                                                      |                                                     |
|--------------------------------|------------------------------------------------------|-----------------------------------------------------|
| <input type="checkbox"/> a     | <input type="checkbox"/> not available in the system | <input type="checkbox"/> available but not targeted |
| <input type="checkbox"/> de*   | <input type="checkbox"/> not available in the system | <input type="checkbox"/> available but not targeted |
| <input type="checkbox"/> en    | <input type="checkbox"/> not available in the system | <input type="checkbox"/> available but not targeted |
| <input type="checkbox"/> para* | <input type="checkbox"/> not available in the system | <input type="checkbox"/> available but not targeted |

Other: \_\_\_\_\_

Total # of Prepositions:

## INTERJECTIONS

- |                                  |                                                      |                                                     |
|----------------------------------|------------------------------------------------------|-----------------------------------------------------|
| <input type="checkbox"/> adiós   | <input type="checkbox"/> not available in the system | <input type="checkbox"/> available but not targeted |
| <input type="checkbox"/> gracias | <input type="checkbox"/> not available in the system | <input type="checkbox"/> available but not targeted |

Other: \_\_\_\_\_

Total # of Interjections:

## CONJUNCTIONS

- |                             |                                                      |                                                     |
|-----------------------------|------------------------------------------------------|-----------------------------------------------------|
| <input type="checkbox"/> y* | <input type="checkbox"/> not available in the system | <input type="checkbox"/> available but not targeted |
|-----------------------------|------------------------------------------------------|-----------------------------------------------------|

Other: \_\_\_\_\_

Total # of Conjunctions:

\* High frequency words >100 according to Piñeiro & Manzano (2000)



## II. Morphology

Mark the endings, derivations, and conjugations of the words or contractions that appear in your sample. Use this section in conjunction with the vocabulary checklist. Also, make a note if the morphological derivations in the Protocol are not available in the client's AAC system or have not been targeted in intervention.

### 1. GENDER/GÉNERO (e.g., *niño, niña*)

☐ masculine

☐ feminine

Notes/Utterances (write exemplars of gender produced): \_\_\_\_\_

\_\_\_\_\_

### 2. PLURAL (e.g., *casas, muñecas*)

☐ singular

☐ plural

Notes/Utterances (write exemplars of plurals produced): \_\_\_\_\_

\_\_\_\_\_

### 3. DIMUNITIVES/SUPERLATIVES-DIMUNITIVOS/SUPERLATIVOS

(e.g., *cochecito, grandullón*)

☐ produced

☐ not produced

Notes/Utterances (write exemplars of dimunitives/superlatives produced): \_\_\_\_\_

\_\_\_\_\_

### 4. IMPERATIVE/IMPERATIVO (e.g., *dame, toma, mira*)

☐ produced

☐ not produced

Notes/Utterances (write exemplars of imperatives produced): \_\_\_\_\_

\_\_\_\_\_

## 5. COPULA/CÓPULA (e.g., *ser, estar, parecer*)

☐ produced

☐ not produced

Notes/Utterances (write exemplars of copulas produced): \_\_\_\_\_

\_\_\_\_\_

## 6. PARTICIPLE/PARTICIOPIO (e.g., *roto, mojado*)

☐ produced

☐ not produced

Notes/Utterances (write exemplars of participles produced): \_\_\_\_\_

\_\_\_\_\_

## 7. COMPOUND PAST/PRETÉRITO PERFECTO (e.g., *he comido*) auxiliary plus participle

☐ produced

☐ not produced

Notes/Utterances (write exemplars of compound past produced): \_\_\_\_\_

\_\_\_\_\_

## 8. IMPERFECT PAST/PRETÉRITO IMPERFECTO (e.g., *comía, jugaba*)

☐ produced

☐ not produced

Notes/Utterances (write exemplars of imperfect past produced): \_\_\_\_\_

\_\_\_\_\_

## 9. GERUND/GERUNDIO (e.g., *lloviendo*)

☐ produced

☐ not produced

Notes/Utterances (write exemplars of gerund produced): \_\_\_\_\_

\_\_\_\_\_

## 10. PERIPHRASTIC FUTURE/FUTURO PERIFRÁSTICO (e.g., *voy a*)

☐ produced

☐ not produced

Notes/Utterances (write exemplars of periphrastic future produced): \_\_\_\_\_

\_\_\_\_\_

## 11. FUTURE/FUTURO (e.g., *iré*)

☐ produced

☐ not produced

Notes/Utterances (write exemplars of future tense produced): \_\_\_\_\_

\_\_\_\_\_

## 12. SUBJUNCTIVE/SUBJUNTIVO (e.g., *que vayas*)

☐ produced

☐ not produced

Notes/Utterances (write exemplars of subjunctive produced): \_\_\_\_\_

\_\_\_\_\_

Total # of Different Morphological Structures:  of 12

(The sum of all different morphological structures)

Total # of Morphological Structures:

(ALL instances of observed morphological structures, e.g., 2 gender, 5 plurals, etc.)

### III. Grammatical Complexity

When the language sample includes clauses, sentences, or phrases, mark the types of structures included in the protocol. Each structure gets scored only once, but you can write the exemplars of such structures in the notes column. Also, check if the grammatical structures in the Protocol are not available in the client's AAC system or have not been targeted in the intervention yet. The presentation of grammatical structures follows the order of appearance in typical development. It is possible that the individual uses structures that follow a different order of appearance, or that he/she does not use structures that appear in the list.

#### SIMPLE CLAUSE

##### Noun Phrase/Sintagma Nominal

| Article + Noun                                                                                                                                                      | Point Value                       | Notes/Utterances |
|---------------------------------------------------------------------------------------------------------------------------------------------------------------------|-----------------------------------|------------------|
| <b>Approximation (e.g., gesture, vocalization, word substitution, involuntary activation, activation of word near target) + noun</b><br>(e.g., gesture + nena/girl) | <input type="checkbox"/> 1 point  |                  |
| <b>Article (any type) + noun</b><br>(e.g., la nena/the girl)                                                                                                        | <input type="checkbox"/> 2 points |                  |

| Determinant + Noun                                                  | Point Value                       | Notes/Utterances |
|---------------------------------------------------------------------|-----------------------------------|------------------|
| <b>Approximation + noun</b><br>(e.g., gesture + nena/girl)          | <input type="checkbox"/> 1 point  |                  |
| <b>Determinant (any type) + noun</b><br>(e.g., esta nena/this girl) | <input type="checkbox"/> 2 points |                  |

| <b>[Article] + Noun + Adjective</b>                                                        | <b>Point Value</b>                | <b>Notes/Utterances</b> |
|--------------------------------------------------------------------------------------------|-----------------------------------|-------------------------|
| <b>Noun + adjective (no noun adjective agreement)</b><br>(e.g., nenas bonita/pretty girls) | <input type="checkbox"/> 1 point  |                         |
| <b>Approximation + noun + adjective</b><br>(e.g., gesture + nena/girl + guapa/pretty)      | <input type="checkbox"/> 2 points |                         |
| <b>Article + noun + adjective</b><br>(e.g., la nena guapa/the beautiful girl)              | <input type="checkbox"/> 3 points |                         |

| <b>[Determinant] + Noun + Adjective</b>                                                    | <b>Point Value</b>                | <b>Notes/Utterances</b> |
|--------------------------------------------------------------------------------------------|-----------------------------------|-------------------------|
| <b>Noun + adjective (no noun adjective agreement)</b><br>(e.g., nenas bonita/pretty girls) | <input type="checkbox"/> 1 point  |                         |
| <b>Noun + adjective agreement</b><br>(e.g., nenas bonitas/pretty girls)                    | <input type="checkbox"/> 2 points |                         |
| <b>Determinant + noun + adjective</b><br>(e.g., estas nenas bonitas/those pretty girls)    | <input type="checkbox"/> 3 points |                         |

## Verbal Phrase/Sintagma Verbal

| Person Marking in the Verb                                         | Point Value                       | Notes/Utterances |
|--------------------------------------------------------------------|-----------------------------------|------------------|
| Only impersonal/3 <sup>rd</sup> person present singular/Imperative | <input type="checkbox"/> 1 point  |                  |
| Only 1 person (e.g., 1 <sup>st</sup> singular)                     | <input type="checkbox"/> 2 points |                  |
| 2 or more persons                                                  | <input type="checkbox"/> 3 points |                  |

| Compound Past/Pretérito Perfecto          | Point Value                       | Notes/Utterances |
|-------------------------------------------|-----------------------------------|------------------|
| No past/only participle (e.g., roto)      | <input type="checkbox"/> 1 point  |                  |
| Auxiliary plus participle (e.g., he roto) | <input type="checkbox"/> 2 points |                  |

| Periphrastic Future/Futuro próximo/Futuro perifrástico    | Point Value                       | Notes/Utterances |
|-----------------------------------------------------------|-----------------------------------|------------------|
| Lexicalized future (e.g., mañana/tomorrow)                | <input type="checkbox"/> 1 point  |                  |
| A + infinitive (e.g., to eat/a comer)                     | <input type="checkbox"/> 2 points |                  |
| Periphrastic future (e.g., I am going to eat/Voy a comer) | <input type="checkbox"/> 3 points |                  |

| Clitics/Clíticos*                                      | Point Value                       | Notes/Utterances |
|--------------------------------------------------------|-----------------------------------|------------------|
| <b>1 form</b><br>(e.g., give me/dame)                  | <input type="checkbox"/> 1 point  |                  |
| <b>2 or more forms</b><br>(e.g., Give it to me/Dámelo) | <input type="checkbox"/> 2 points |                  |

\*pronouns attached to the verb

| Prepositional Phrases                                                                           | Point Value                       | Notes/Utterances |
|-------------------------------------------------------------------------------------------------|-----------------------------------|------------------|
| <b>Approximation</b><br>(e.g., where daddy/donde papá?; de papá)                                | <input type="checkbox"/> 1 point  |                  |
| <b>Correct form (verb + preposition)</b><br>(e.g., Where is daddy/Dónde está papa?; Es de papá) | <input type="checkbox"/> 2 points |                  |

| Possessive Phrases                                                                                                          | Point Value                       | Notes/Utterances |
|-----------------------------------------------------------------------------------------------------------------------------|-----------------------------------|------------------|
| <b>Pre-grammatical marking</b><br>(e.g., possessor-possessioned (pencil boy/lápiz nene)/invariable 'mine') or approximation | <input type="checkbox"/> 1 point  |                  |
| <b>Correct form no verb</b><br>(e.g., my pencil/mi lápiz)                                                                   | <input type="checkbox"/> 2 points |                  |
| <b>Correct form + verb</b><br>(e.g., It is my pencil/Es mi lápiz)                                                           | <input type="checkbox"/> 3 points |                  |

| Subjunctive Phrases                                                                              | Point Value                       | Notes/Utterances |
|--------------------------------------------------------------------------------------------------|-----------------------------------|------------------|
| <b>Attempt or approximation</b><br>(e.g., no come/no viene/vení no for 'don't come'/'no vengas') | <input type="checkbox"/> 1 point  |                  |
| <b>Correct form</b><br>(e.g., Don't come/No vengas/Que vengas)                                   | <input type="checkbox"/> 2 points |                  |

| Copula*                                                  | Point Value                       | Notes/Utterances |
|----------------------------------------------------------|-----------------------------------|------------------|
| <b>No verb</b><br>(e.g., nena guapa/girl pretty)         | <input type="checkbox"/> 1 point  |                  |
| <b>With verb</b><br>(e.g., nena es guapa/girl is pretty) | <input type="checkbox"/> 2 points |                  |

\*e.g., ser, estar, parecer

| Negative sentences/<br>Oraciones simples<br>negativas                | Point Value                       | Notes/Utterances |
|----------------------------------------------------------------------|-----------------------------------|------------------|
| <b>No verb</b><br>(e.g., esto no/this no)                            | <input type="checkbox"/> 1 point  |                  |
| <b>Negative + infinitive</b><br>(e.g., No tocar/Do not touch)        | <input type="checkbox"/> 2 points |                  |
| <b>Correct form (no +<br/>conjugated verb)</b><br>(e.g., No se toca) | <input type="checkbox"/> 3 points |                  |



| Interrogative sentences/<br>Oraciones simples<br>interrogativas                                                                         | Point Value | Notes/Utterances |
|-----------------------------------------------------------------------------------------------------------------------------------------|-------------|------------------|
| <b>Use of interrogation</b><br>(e.g., is car/está coche? or<br>car/coche?)                                                              | ☐ 1 point   |                  |
| <b>Correct form (preposition +<br/>verb; pronoun + verb)</b><br>(e.g., Where is the car/Dónde<br>está el coche? Who is he/Quién<br>es?) | ☐ 2 points  |                  |

## COMPLEX AND COMPOUND SENTENCES

| Coordination                                                                                                   | Point Value | Notes/Utterances |
|----------------------------------------------------------------------------------------------------------------|-------------|------------------|
| <b>Juxtaposition</b><br>(e.g., I play a little, then<br>sleep/Juego un poco, luego a<br>dormir)                | ☐ 1 point   |                  |
| <b>Correct form</b><br>(e.g., I play a little and then I go<br>to sleep/Juego un poco y luego<br>voy a dormir) | ☐ 2 points  |                  |

| Subordination                                                                           | Point Value                       | Notes/Utterances |
|-----------------------------------------------------------------------------------------|-----------------------------------|------------------|
| <b>Approximation</b><br>(e.g., I want you go/Quiero tu ir)                              | <input type="checkbox"/> 1 point  |                  |
| <b>Sub. completivas (que + infinitive)</b><br>(e.g., I want you to go/Quiero que tu ir) | <input type="checkbox"/> 2 points |                  |
| <b>Other types of subordination</b><br>(e.g., I want you to go/Quiero que vayas)        | <input type="checkbox"/> 3 points |                  |

\*adapted from Protocolo de Observación del Desarrollo Gramatical Temprano by Equipo de Investigación en Adquisición del Lenguaje, Universidad Complutense de Madrid, España

Total Grammatical Complexity Score:

## IV. Syntax

Write each word combination in the notes column according to the type of word order as shown below. Categorize the order of the words according to their function within the utterance (e.g., subject, verb, object, etc.).

Subject: Person, animal or thing that acts

Verb: Action

Object: Who or what has been affected by the verb

Complement: Adjective or noun modifier

Question word: Pronoun/preposition that starts a question

Adverb: A verb modifier

### 1. OBJECT + SUBJECT (e.g., Coche papá)

☐ produced

☐ not produced

Notes/Utterances (write exemplars of object + subject utterances produced): \_\_\_\_\_

\_\_\_\_\_

### 2. SUBJECT + OBJECT (e.g., Papá coche)

☐ produced

☐ not produced

Notes/Utterances (write exemplars of subject + object utterances produced): \_\_\_\_\_

\_\_\_\_\_

### 3. VERB + SUBJECT (e.g., Como) Subject embedded in verb or infinitive

☐ produced

☐ not produced

Notes/Utterances (write exemplars of verb + subject utterances produced): \_\_\_\_\_

\_\_\_\_\_

#### 4. VERB + OBJECT (e.g., Como pan)

☐ produced

☐ not produced

Notes/Utterances (write exemplars of verb + object utterances produced): \_\_\_\_\_

\_\_\_\_\_

#### 5. SUBJECT + VERB (e.g., Mamá come)

☐ produced

☐ not produced

Notes/Utterances (write exemplars of subject + verb utterances produced): \_\_\_\_\_

\_\_\_\_\_

#### 6. QUESTION WORD + VERB (e.g., ¿Qué es?)

☐ produced

☐ not produced

Notes/Utterances (write exemplars of question word + verb utterances produced): \_\_\_\_\_

\_\_\_\_\_

#### 7. VERB + SUBJECT + OBJECT (e.g., Quiero muñeca)

☐ produced

☐ not produced

Notes/Utterances (write exemplars of verb + subject + object utterances produced): \_\_\_\_\_

\_\_\_\_\_

## 8. SUBJECT + VERB + OBJECT (e.g., Nena quiere muñeca)

☐ produced

☐ not produced

Notes/Utterances (write exemplars of subject + verb + object utterances produced): \_\_\_\_\_

\_\_\_\_\_

## 9. VERB + SUBJECT + ADVERB (e.g., Corro rápido)

☐ produced

☐ not produced

Notes/Utterances (write exemplars of verb + subject + adverb utterances produced): \_\_\_\_\_

\_\_\_\_\_

## 10. SUBJECT + VERB + ADVERB (e.g., Nena tiene frío)

☐ produced

☐ not produced

Notes/Utterances (write exemplars of subject + verb + adverb utterances produced): \_\_\_\_\_

\_\_\_\_\_

## 11. VERB + OBJECT + OBJECT (e.g., Doy un beso a papá)

☐ produced

☐ not produced

Notes/Utterances (write exemplars of verb + subject + object utterances produced): \_\_\_\_\_

\_\_\_\_\_

## 12. VERB + OBJECT + COMPLEMENT (e.g., Tomo leche caliente)

☐ produced

☐ not produced

Notes/Utterances (write exemplars of verb + subject + complement utterances produced): \_\_\_\_\_

\_\_\_\_\_

## 13. QUESTION WORD + VERB + SUBJECT (e.g., ¿Dónde está papá?)

☐ produced

☐ not produced

Notes/Utterances (write exemplars of question word + verb + subject utterances produced): \_\_\_\_\_

\_\_\_\_\_

## 14. SUBJECT + OBJECT + VERB + OBJECT (e.g., Papá me da un beso)

☐ produced

☐ not produced

Notes/Utterances (write exemplars of subject + object + verb + object utterances produced): \_\_\_\_\_

\_\_\_\_\_

Total # of Different Syntactic Structures:  of 14

(The sum of all different syntactic structures)

Total # of Syntactic Structures:

(ALL instances combined of observed syntactic structures. e.g., 5 subject + object, 2 verb + subject + adverb, etc.)

## Results

|                                                       |  |
|-------------------------------------------------------|--|
| <b>Total # of Utterances:</b>                         |  |
| <b>Total # of Words:</b>                              |  |
| <b>Total # of Different Words:</b>                    |  |
| <b>Total # of Nouns:</b>                              |  |
| <b>Total # of Verbs:</b>                              |  |
| <b>Total # of Pronouns and Determinants:</b>          |  |
| <b>Total # of Adverbs:</b>                            |  |
| <b>Total # of Adjectives:</b>                         |  |
| <b>Total # of Substitutes:</b>                        |  |
| <b>Total # of Articles:</b>                           |  |
| <b>Total # of Numerals:</b>                           |  |
| <b>Total # of Prepositions:</b>                       |  |
| <b>Total # of Interjections:</b>                      |  |
| <b>Total # of Conjunctions:</b>                       |  |
| <b>Total # of Morphological Structures:</b>           |  |
| <b>Total # of Different Morphological Structures:</b> |  |
| <b>Total Score for Grammatical Complexity:</b>        |  |
| <b>Total # of Syntactic Structures:</b>               |  |
| <b>Total # of Different Syntactic Structures</b>      |  |
