# Supplementary material
Source: publisher figshare collection journal article supplement (https://asha.figshare.com/articles/dataset/_/19233237)
Supplement: Supplementary file 2 [file 1]

## Supplemental Material S2. Luna’s language samples.

### Language Sample #1: Hide and Seek

| #   | Utterance                 |
|-----|---------------------------|
| 1.  | Yo                        |
| 2.  | Yo                        |
| 3.  | Si                        |
| 4.  | Necesito_Ayuda            |
| 5.  | No                        |
| 6.  | Yo quiero ir jugando      |
| 7.  | Buscar                    |
| 8.  | Poner Esconder            |
| 9.  | Sí [Gesture]              |
| 10. | Camiseta Vaquero Calabaza |
| 11. | Autobús Autobús           |
| 12. | Mano                      |
| 13. | Uñas Culo                 |
| 14. | Pierna                    |
| 15. | Debajo                    |
| 16. | Culo                      |

## RESULTS

Total # of Utterances: \_\_\_\_\_ 16 \_\_\_\_\_

Total # of Words: \_\_\_\_\_ 25 \_\_\_\_\_

Total # of Different Words: \_\_\_\_\_ 20 \_\_\_\_\_

Total # of Nouns: 9 (ayuda, camiseta, vaquero, calabaza, autobus, mano, uñas, culo, pierna)

Total # of Verbs: 6 (necesito, quiero, ir, jugando, buscar, poner, esconder)

Total # of Pronouns and Determinants: 1 (yo)

Total # of Adverbs: 0

Total # of Adjectives: 0

Total # of Substitutes: 0

Total # of Articles: 0

Total # of Numerals: 0

Total # of Prepositions: 1 (debajo)

Total # of Interjections: 2 (sí, no)

Total # of Morphemes: 4 (necesito, quiero, jugando, uñas)

Total # of Different Morphemes: 3 (plural -s; gerund: jugando; first person singular: quiero, necesito)

Total Score for Grammatical Complexity: 1 (verbal phrase, one person: quiero)

Total # of Syntactic Structures Observed 1 (S+V:quiero ir)

## Language Sample #2: Story Generation

| #  | Utterance             |
|----|-----------------------|
| 1. | Leer                  |
| 2. | Tu quieres hacer leer |
| 3. | Sol                   |
| 4. | Jugar                 |
| 5. | Estar                 |
| 6. | Amigos                |

|            |                    |
|------------|--------------------|
| <b>7.</b>  | Contar             |
| <b>8.</b>  | Tocar              |
| <b>9.</b>  | Contar             |
| <b>10.</b> | Tocar              |
| <b>11.</b> | Llamar             |
| <b>12.</b> | Elefante           |
| <b>13.</b> | León               |
| <b>14.</b> | Buscar             |
| <b>15.</b> | Trabajar Beber     |
| <b>16.</b> | Querer Comer Doler |
| <b>17.</b> | Volar Encender     |
| <b>18.</b> | Cacho Mucho        |
| <b>19.</b> | Cacho              |
| <b>20.</b> | Nada               |
| <b>21.</b> | Amigos             |
| <b>22.</b> | Todos              |

## RESULTS

Total # of Utterances: \_\_\_\_\_ 22 \_\_\_\_\_

Total # of Words: \_\_\_\_\_ 30 \_\_\_\_\_

Total # of Different Words: \_\_\_\_\_ 23 \_\_\_\_\_

Total # of Nouns:   5   (sol, amigos, elefante, león, cacho) \_\_\_\_\_

Total # of Verbs: 16

(leer, quieres, hacer, jugar, estar, contar, tocar, llamar, buscar, trabajar, beber, querer, comer, doler, volar, encender)

Total # of Pronouns and Determinants: \_\_\_\_ 1 (tu) \_\_\_\_\_

Total # of Adverbs: \_\_\_\_ 3 (mucho, todo, nada) \_\_\_\_\_

Total # of Adjectives: \_\_\_\_ 0 \_\_\_\_\_

Total # of Substitutes: \_\_\_\_ 0 \_\_\_\_\_

Total # of Articles: \_\_\_\_ 0 \_\_\_\_\_

Total # of Numerals: \_\_\_\_ 0 \_\_\_\_\_

Total # of Prepositions: \_\_\_\_ 0 \_\_\_\_\_

Total # of Interjections: \_\_\_\_ 0 \_\_\_\_\_

Total # of Morphemes: \_\_\_\_ 3 (amigos, todos, quieres) \_\_\_\_\_

Total # of Different Morphemes: 2 (plural -s; second person singular: quieres) \_\_\_\_\_

Total Score for Grammatical Complexity: \_\_\_\_ 1 (verbal phrase, one person: quieres) \_\_\_\_\_

Total # of Syntactic Structures Observed \_\_\_\_ 1 (S+V:quieres leer) \_\_\_\_\_

#### Language Sample #2: Story Comprehension

| #  | Utterance         |
|----|-------------------|
| 1. | Yo no no lo se    |
| 2. | Si (gesture)      |
| 3. | Querer jugar      |
| 4. | ver               |
| 5. | nosotras          |
| 6. | Tener se acabo no |
| 7. | ¿Que?             |
| 8. | Pintar            |

|            |                            |
|------------|----------------------------|
| <b>9.</b>  | Sí (gesture)               |
| <b>10.</b> | Estamos                    |
| <b>11.</b> | Tu                         |
| <b>12.</b> | Ver                        |
| <b>13.</b> | Nosotras pintamos más      |
| <b>14.</b> | No me gusta                |
| <b>15.</b> | Eso yo                     |
| <b>16.</b> | Yo estar gustar            |
| <b>17.</b> | Pintar tocar               |
| <b>18.</b> | Hacer tu                   |
| <b>19.</b> | Yo                         |
| <b>20.</b> | Lees leer                  |
| <b>21.</b> | Si                         |
| <b>22.</b> | Vaca, cerdo (vocalization) |
| <b>23.</b> | Cabra                      |
| <b>24.</b> | La cabra                   |

## RESULTS

Total # of Utterances: \_\_\_\_\_ 24 \_\_\_\_\_

Total # of Words: \_\_\_\_\_ 45 \_\_\_\_\_

Total # of Different Words: \_\_\_\_\_ 36 \_\_\_\_\_

Total # of Nouns: 3 (vaca, cabra, cerdo) \_\_\_\_\_

Total # of Verbs: 17

(soy, sé, querer, jugar, ver, tener, acabó, pintar, ver, estamos, pintamos, gusta, estar, gustar, tocar, hacer, lees, leer) \_\_\_\_\_

Total # of Pronouns and Determinants: \_\_7 pronouns (yo, tu, me, nosotras, lo, se, que) and 1 determinant (eso) \_\_\_\_\_

Total # of Adverbs: \_\_1 (más)\_\_\_\_\_

Total # of Adjectives: \_\_0\_\_\_\_\_

Total # of Substitutes: \_\_0\_\_\_\_\_

Total # of Articles: \_\_1 (la)\_\_\_\_\_

Total # of Numerals: \_\_0\_\_\_\_\_

Total # of Prepositions: \_\_0\_\_\_\_\_

Total # of Interjections: \_\_1 (sí)\_\_\_\_\_

Total # of Morphemes: \_\_\_\_4\_ (nosotras, soy, lees, estamos, pintamos)\_\_\_\_\_

Total # of Different Morphemes: 3 (plural -s: nosotras; first person singular: soy, second person singular: lees, first person plural: estamos, pintamos) \_\_\_\_\_

Total Score for Grammatical Complexity: \_10\_ (3 points for article plus noun: la cabra; 3 points for two or more persons marking in the verb: estamos, lees; 2 points for the use of negative sentences: yo no lo se; 2 points for the use of interrogation ¿Que?)\_\_\_\_\_

Total # of Syntactic Structures Observed \_\_3 (S+V: Lees; S+V+O: Yo no lo se; No me gusta; S+V+A: Nosotras pintamós más)\_\_\_\_\_
